# Supplementary material
Source: PubMed Central journal article supplement (PMC2897819)

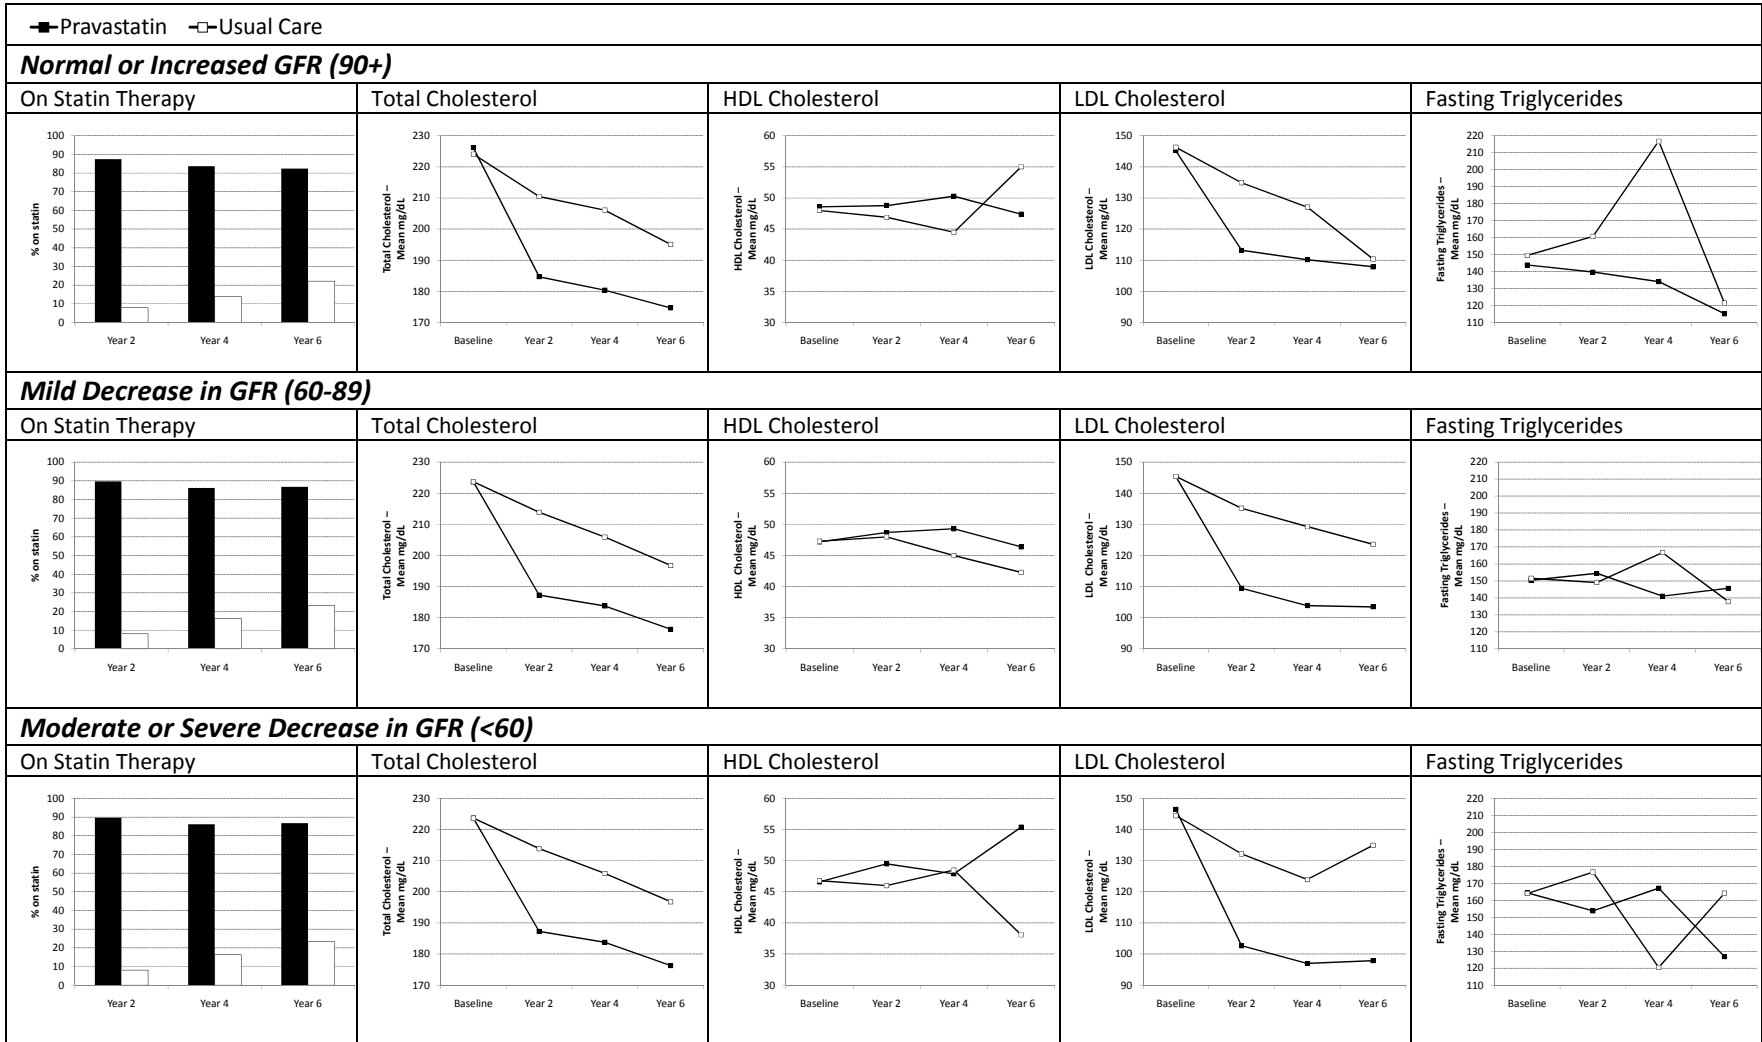

Supplement: NIHMS67791-supplement-01.pdf [file NIHMS67791-supplement-01.pdf]
